# Supplementary material
Source: HighWire-hosted journal article supplement (https://cmaj.ca/highwire/filestream/149498/field_highwire_adjunct_files/3/221318-res-4-at.pdf)
Supplement: 221318-res-4-at.pdf [file 221318-res-4-at.pdf]

**eTable 4.** Monthly observed and expected rates per 100,000 and adjusted relative change (RR, 95% CI) in eating disorder-related emergency department visits and hospitalizations in Ontario during the pandemic era, by sex.

|                | Female                      |               |                   |                  |               |                   | Male                        |               |                   |                  |               |                   |
|----------------|-----------------------------|---------------|-------------------|------------------|---------------|-------------------|-----------------------------|---------------|-------------------|------------------|---------------|-------------------|
|                | Emergency department visits |               |                   | Hospitalizations |               |                   | Emergency department visits |               |                   | Hospitalizations |               |                   |
|                | Observed rate               | Expected rate | RR (95% CI)       | Observed rate    | Expected rate | RR (95% CI)       | Observed rate               | Expected rate | RR (95% CI)       | Observed rate    | Expected rate | RR (95% CI)       |
| Overall        | 2.28                        | 1.39          | 1.63 (1.55, 1.72) | 2.48             | 1.98          | 1.25 (1.16, 1.35) | 0.21                        | 0.18          | 1.14 (0.99, 1.31) | 0.25             | 0.22          | 1.13 (1.08, 1.17) |
| March 2020     | 1.18                        | 1.42          | 0.83 (0.81, 0.86) | 1.67             | 1.94          | 0.86 (0.82, 0.90) | 0.09                        | 0.17          | 0.53 (0.49, 0.57) | 0.17             | 0.22          | 0.77 (0.76, 0.79) |
| April 2020     | 1.06                        | 1.42          | 0.75 (0.73, 0.77) | 1.5              | 1.94          | 0.77 (0.74, 0.81) | 0.09                        | 0.17          | 0.52 (0.48, 0.57) | 0.12             | 0.22          | 0.56 (0.55, 0.58) |
| May 2020       | 1.3                         | 1.42          | 0.92 (0.89, 0.94) | 1.81             | 1.95          | 0.93 (0.89, 0.98) | 0.09                        | 0.17          | 0.52 (0.48, 0.57) | 0.17             | 0.22          | 0.77 (0.75, 0.79) |
| June 2020      | 1.75                        | 1.41          | 1.24 (1.20, 1.28) | 2.2              | 1.95          | 1.13 (1.07, 1.18) | 0.17                        | 0.18          | 0.96 (0.88, 1.05) | 0.17             | 0.22          | 0.77 (0.75, 0.79) |
| July 2020      | 1.99                        | 1.41          | 1.41 (1.36, 1.46) | 2.51             | 1.95          | 1.28 (1.22, 1.35) | 0.14                        | 0.18          | 0.78 (0.71, 0.86) | 0.17             | 0.22          | 0.77 (0.75, 0.79) |
| August 2020    | 2.03                        | 1.41          | 1.44 (1.39, 1.49) | 2.46             | 1.96          | 1.26 (1.19, 1.33) | 0.17                        | 0.18          | 0.95 (0.87, 1.05) | 0.2              | 0.22          | 0.91 (0.89, 0.94) |
| September 2020 | 2.05                        | 1.41          | 1.45 (1.40, 1.51) | 2.49             | 1.96          | 1.27 (1.20, 1.34) | 0.12                        | 0.18          | 0.69 (0.63, 0.77) | 0.18             | 0.22          | 0.84 (0.82, 0.87) |
| October 2020   | 2.4                         | 1.41          | 1.70 (1.64, 1.77) | 2.67             | 1.96          | 1.36 (1.28, 1.44) | 0.17                        | 0.18          | 0.95 (0.85, 1.05) | 0.24             | 0.22          | 1.12 (1.09, 1.16) |
| November 2020  | 2.46                        | 1.41          | 1.75 (1.68, 1.82) | 2.71             | 1.97          | 1.38 (1.30, 1.46) | 0.12                        | 0.18          | 0.69 (0.62, 0.77) | 0.26             | 0.22          | 1.19 (1.15, 1.23) |
| December 2020  | 2.06                        | 1.41          | 1.47 (1.41, 1.53) | 2.62             | 1.97          | 1.33 (1.25, 1.42) | 0.24                        | 0.18          | 1.37 (1.23, 1.54) | 0.21             | 0.22          | 0.98 (0.95, 1.01) |
| January 2021   | 2.35                        | 1.4           | 1.67 (1.61, 1.74) | 2.94             | 1.97          | 1.50 (1.40, 1.59) | 0.1                         | 0.18          | 0.59 (0.52, 0.66) | 0.27             | 0.22          | 1.24 (1.19, 1.28) |
| February 2021  | 2.42                        | 1.4           | 1.73 (1.65, 1.80) | 2.71             | 1.97          | 1.38 (1.29, 1.47) | 0.16                        | 0.18          | 0.93 (0.82, 1.04) | 0.25             | 0.22          | 1.17 (1.13, 1.21) |
| March 2021     | 2.94                        | 1.4           | 2.10 (2.01, 2.20) | 3.07             | 1.97          | 1.56 (1.45, 1.67) | 0.19                        | 0.18          | 1.09 (0.96, 1.24) | 0.31             | 0.22          | 1.44 (1.39, 1.49) |
| April 2021     | 3.01                        | 1.4           | 2.15 (2.06, 2.25) | 3.24             | 1.97          | 1.64 (1.53, 1.76) | 0.28                        | 0.18          | 1.59 (1.40, 1.81) | 0.28             | 0.22          | 1.30 (1.25, 1.35) |
| May 2021       | 2.79                        | 1.4           | 2.00 (1.91, 2.10) | 2.9              | 1.98          | 1.46 (1.36, 1.57) | 0.22                        | 0.18          | 1.25 (1.10, 1.43) | 0.33             | 0.22          | 1.51 (1.45, 1.57) |
| June 2021      | 2.78                        | 1.4           | 1.99 (1.90, 2.09) | 2.87             | 1.98          | 1.45 (1.34, 1.56) | 0.24                        | 0.18          | 1.33 (1.16, 1.53) | 0.28             | 0.22          | 1.30 (1.25, 1.35) |
| July 2021      | 2.27                        | 1.4           | 1.63 (1.55, 1.71) | 2.29             | 1.98          | 1.15 (1.07, 1.24) | 0.16                        | 0.18          | 0.92 (0.79, 1.05) | 0.27             | 0.22          | 1.23 (1.18, 1.28) |
| August 2021    | 2.46                        | 1.39          | 1.76 (1.68, 1.86) | 2.43             | 1.99          | 1.22 (1.13, 1.32) | 0.28                        | 0.18          | 1.58 (1.36, 1.82) | 0.34             | 0.22          | 1.57 (1.51, 1.64) |

|                |      |      |                   |      |      |                   |      |      |                   |      |      |                   |
|----------------|------|------|-------------------|------|------|-------------------|------|------|-------------------|------|------|-------------------|
| September 2021 | 2.53 | 1.39 | 1.82 (1.72, 1.92) | 2.59 | 1.99 | 1.30 (1.20, 1.41) | 0.16 | 0.18 | 0.91 (0.78, 1.06) | 0.28 | 0.22 | 1.30 (1.24, 1.36) |
| October 2021   | 3.3  | 1.39 | 2.37 (2.25, 2.50) | 3.29 | 1.99 | 1.65 (1.52, 1.79) | 0.21 | 0.18 | 1.16 (0.99, 1.35) | 0.36 | 0.22 | 1.64 (1.57, 1.71) |
| November 2021  | 3.45 | 1.39 | 2.48 (2.34, 2.62) | 2.94 | 2    | 1.47 (1.35, 1.60) | 0.33 | 0.18 | 1.81 (1.55, 2.12) | 0.36 | 0.22 | 1.64 (1.56, 1.72) |
| December 2021  | 2.23 | 1.39 | 1.60 (1.51, 1.70) | 2.45 | 2    | 1.22 (1.12, 1.34) | 0.31 | 0.18 | 1.73 (1.47, 2.03) | 0.19 | 0.22 | 0.89 (0.84, 0.93) |
| January 2022   | 2.43 | 1.38 | 1.75 (1.65, 1.86) | 2.34 | 2    | 1.17 (1.07, 1.28) | 0.19 | 0.18 | 1.05 (0.89, 1.25) | 0.22 | 0.22 | 1.01 (0.96, 1.06) |
| February 2022  | 2.6  | 1.38 | 1.88 (1.77, 1.99) | 2.53 | 2    | 1.26 (1.15, 1.39) | 0.28 | 0.18 | 1.54 (1.30, 1.82) | 0.18 | 0.22 | 0.81 (0.77, 0.85) |
| March 2022     | 2.41 | 1.38 | 1.75 (1.64, 1.86) | 2.48 | 2    | 1.24 (1.13, 1.36) | 0.31 | 0.18 | 1.70 (1.43, 2.02) | 0.25 | 0.22 | 1.14 (1.09, 1.20) |
| April 2022     | 2.1  | 1.38 | 1.52 (1.43, 1.62) | 2.47 | 2    | 1.23 (1.12, 1.36) | 0.22 | 0.18 | 1.21 (1.01, 1.44) | 0.37 | 0.22 | 1.68 (1.59, 1.77) |
| May 2022       | 2.33 | 1.38 | 1.69 (1.58, 1.80) | 2.24 | 2.01 | 1.12 (1.01, 1.23) | 0.41 | 0.18 | 2.25 (1.88, 2.70) | 0.28 | 0.22 | 1.28 (1.21, 1.35) |
| June 2022      | 2.2  | 1.38 | 1.59 (1.49, 1.70) | 2.34 | 2.01 | 1.16 (1.05, 1.29) | 0.19 | 0.18 | 1.04 (0.87, 1.26) | 0.21 | 0.22 | 0.94 (0.89, 0.99) |
| July 2022      | 1.73 | 1.38 | 1.25 (1.17, 1.34) | 1.71 | 2.01 | 0.85 (0.77, 0.94) | 0.22 | 0.18 | 1.20 (0.99, 1.45) | 0.21 | 0.22 | 0.94 (0.89, 0.99) |
| August 2022    | 1.64 | 1.38 | 1.19 (1.11, 1.28) | 2    | 2.02 | 0.99 (0.89, 1.10) | 0.24 | 0.18 | 1.28 (1.05, 1.55) | 0.24 | 0.22 | 1.07 (1.01, 1.14) |

Abbreviations: RR = relative rate; CI = confidence interval
